# Supplementary material
Source: PubMed Central journal article supplement (PMC3080966)
Supplement: 1018981108_pnas.201018981SI.pdf [file 1018981108_pnas.201018981SI.pdf]

# Supporting Information

Shen et al. 10.1073/pnas.1018981108

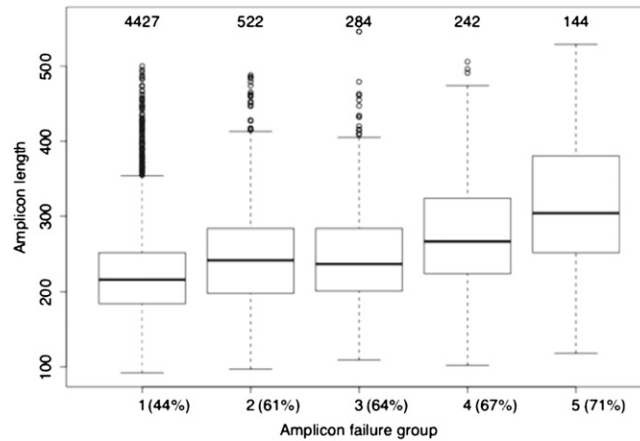

**Fig. S1.** Capture performance related to amplicon length. We defined five groups of targets (x axis) that were captured successfully in all samples (group 1: 4,427 exons) or failed on the basis of our stringent threshold of  $R < 9$  in 1–10 samples (group 2: 522 exons), 11–40 samples (group 3: 284 exons), 41–62 samples (group 4: 242 exons), and failed in all samples (group 5: 144 exons). Except for groups 2 vs. 3, we found statistical significant differences of the amplicon length in the five different groups ( $P$  value  $< 0.0001$  for 1 vs. 2, 3 vs. 4, and 4 vs. 5) indicating a lower capture performance for longer targets. However, these groups also had a different GC content that correlated with the number of failed sample amplicons. On the basis of our analysis of GC content in comparison with longer ( $>274$  bp;  $>80$ th percentile) and shorter ( $<180$  bp;  $<20$ th percentile) amplicons (Fig. 2B), we concluded that amplification failures are largely caused by higher GC content and to a lesser extent by length.

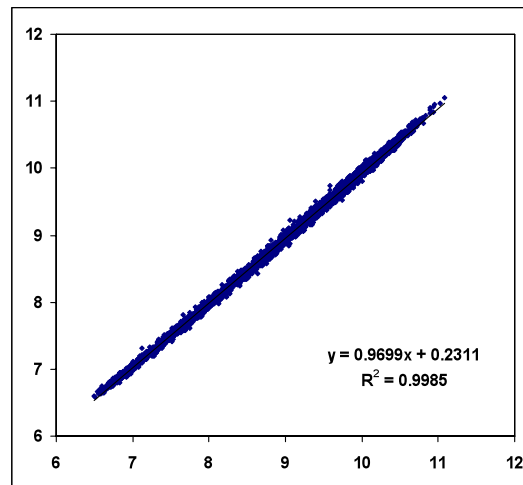

**Fig. S2.** Concordance of a replicate capture of one sample to two different arrays. Shown is a correlation of log intensities of all array probes (measure  $T$ ) of two different arrays (x and y axes, respectively) each of which hybridized with an equal aliquot from one sample preparation. The high concordance ( $R^2 = 0.999$ ) in this technical replicate shows the reproducibility of the resequencing arrays.

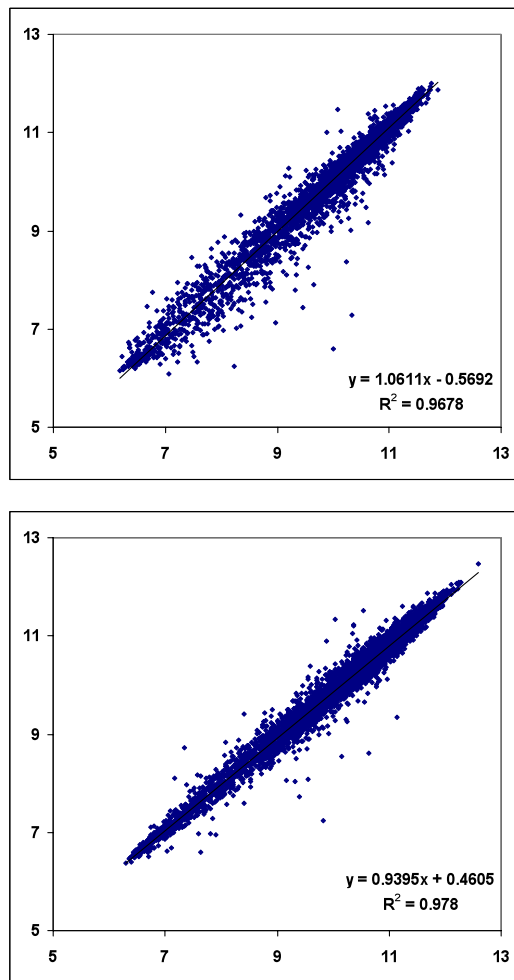

**Fig. S3.** Concordance of capture for genomic and WGA DNA sample preparation. Shown is a correlation of log intensities of all array probes (measure  $T$ ) of two resequencing arrays hybridized with two different genomic DNA samples (*Upper*) and two arrays hybridized with two different WGA DNA samples (*Lower*). This analysis demonstrates the comparable performance of genomic and WGA DNAs in different sample preparations, which is critical in comparative sequence analysis.

Supporting Information for confirmation of the OTC deletion in the male child using aCGH.

ax Server 11/23/2009 4:25:38 PM PAGE 1 FAX Server

**BCM**  
2450 Houshouser  
Fax: 713-798-6584

**MEDICAL GI**

**KLEBERG CYTOGENETICS**

Name: BOY [redacted]  
Sample Type: BLOOD [redacted]

Date of birth: [redacted] Sendouts: [redacted]  
Date collected: 11/23/2009 [redacted]

Hospital #: [redacted] Stanford Hosp & Clinics  
Date received: 11/24/2009

Accession #: [redacted] Clinical Lab/Paratech Dept.  
Report date: 12/8/2009

KCL Lab #: [redacted] 300 Pasteur Dr. Rm. H1524  
Telephone: 650-725-5632

Family #: [redacted] Stanford, CA 94305  
Fax No: 650-723-6757

Indication: Xp11.4 deletion [redacted]

**Chromosomal Microarray Analysis - High Resolution: CMA-HR**

Method: CMA (Oligo V8.0)

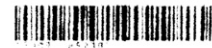

Result: **ABNORMAL - LOSS**

| Change | Chromosome | Min Interval*       | Min Size (Mb) | Max Interval*       | Max Size (Mb) |
|--------|------------|---------------------|---------------|---------------------|---------------|
| LOSS   | Xp11.4     | 37984755 - 38156351 | 0.172         | 37953453 - 38165070 | 0.212         |

RefSeq Genes: *RPGR, OTC*

\* Nucleotide positions based on hg18  
arr Xp11.4(37984755-38156351)x0

**Interpretation:** Chromosomal Microarray Analysis revealed a LOSS in copy number in the Xp11.4 region of the short arm of chromosome X, spanning a minimum of 0.172 Mb and a maximum of 0.212 Mb and containing the OTC and RPGR genes. Mutations or deletions of OTC have been reported in patients with ornithine carbamoyltransferase deficiency (OMIM 311250). Mutations or deletions of RPGR have been reported in patients with retinitis pigmentosa (OMIM 300029), X-linked cone-rod dystrophy (CORDX1; 304020) and a syndromic form of retinitis pigmentosa with deafness and sinorespiratory infections (300455). These results are consistent with the previous prenatal MitoMet array studies [redacted] MitoMet array studies performed on the mother showed that this deletion is maternally inherited [redacted]. Genetic counseling is warranted.

**Disclaimer:** Chromosomal Microarray Analysis (CMA) is a molecular test designed to detect losses or gains representing deletions or duplications for a wide array of clinically significant regions of the human genome. The test will detect virtually all of the cytogenetically detectable microdeletion and microduplication syndromes as well as copy number changes greater than 100 kb and significant exonic changes in selected genes in the nuclear genome. This assay can also detect deletions of the mitochondrial genome that are greater than 2 kb. However, CMA will not detect balanced translocations, inversions, low level mosaicism, point mutations, imprinting disorders, imprinting defects or genomic imbalances in regions not represented in this version of the microarray. Copy number changes of less than 100 kb in regions of unknown clinical significance will not be reported.

**Carlos A. Bacino, M.D., FACMG**  
ABMG Certified Cytogeneticist and Molecular Geneticist  
Medical Director

**Pawel Stankiewicz, M.D., Ph.D.**  
ABMG Certified Clinical Cytogeneticist  
Assistant Laboratory Director

This test was developed and its performance determined by the Kleberg Cytogenetics Laboratory, Baylor College of Medicine. It has not been cleared or approved by the U.S. Food and Drug Administration. It is not intended for clinical purposes. Pursuant to the requirements of CLIA 88, this laboratory has established and verified the test accuracy and precision.

CC: Funs Greg M.D. Fax # 650-398-4525  
Carl Charles Fax # 650-723-6757

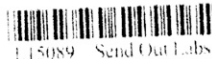

115089 - Send Out Labs

Page No. 1 of 1

**Fig. S4.** Confirmation of the OTC gene deletion using aCGH. In this report for patient P44 (Dataset S3), Chromosomal Microarray Analysis revealed a loss in copy number in the Xp11.4 region of the short arm of chromosome X, spanning a minimum of 0.172 Mb and a maximum of 0.212 Mb and containing the OTC and RPGR genes. Microarray analysis performed on the mother showed that this deletion is maternally inherited, which is consistent with our findings using target capture and array-based resequencing.



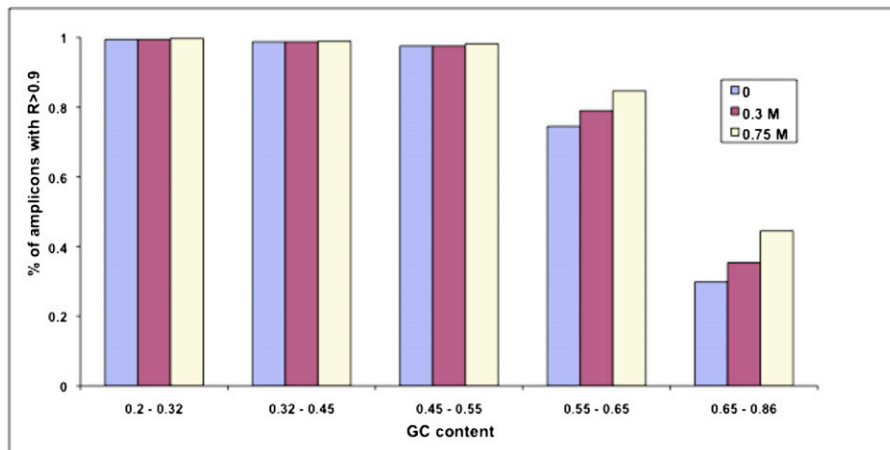

**Fig. S6.** Improved capture performance using betaine supplementation. Shown is the DNA sequence capture performance for all 5,619 targeted exons based on our stringent threshold of  $R \geq 0.9$ . The amplification success was improved by ~1.5-fold (~50% increase of amplicons that passed  $R \geq 0.9$ ) after supplementing betaine at higher concentration (0.75 M) to the capture pools and in particular for exons with a GC content of 55% and higher.

## Other Supporting Information Files

[Dataset S1 \(XLS\)](#)

[Dataset S2 \(XLS\)](#)

[Dataset S3 \(XLS\)](#)
